# Supplementary material for: Sensory modulation dysfunction is associated with Complex Regional Pain Syndrome
Source: PLoS One. 2018 Aug 9;13(8):e0201354. doi: 10.1371/journal.pone.0201354 (PMC6084887; doi:10.1371/journal.pone.0201354)
Supplement: S1 Table — (XLSX) [file pone.0201354.s001.xlsx]

## Sheet: #LN00075
The SAS System
numbe	age	yearbir	gender	CRPS Status	SRQ - Hyper	SRQ -Hypo	SMD Status	crps type	days from crps	Etiology	Location	side	Sensory-symptoms	Vasomotor-symptoms	Sudomotor-symptoms	Motor/Trophic-symptoms	Pain	Allodynia,	Temperature	Color	Sweating	Edema	Dystrophic	Motor	Decreased	Hyperesthesia	Sensory-Signs	Vasomotor-Signs	Sudomotor-Signs	Motor/Trophic-Signs	Hyperalgesia	Allodynia	Temperature	Color	Assymetric	Sweating	Dystrophic	Motor	Decreased
									onset								(symptoms)	and/or	asymmetry	asymmetry	asymmetry	(symptoms)	changes	abnormalities	ROM (symptoms)	or Hypoesthesia					to single	(signs)	asymmetry	asymmetry	edema	asymetry	changes	abnormalities	Active
																		Hyperalgesia	(symptoms)	(symptoms)	(symptoms)		(symptoms)	(symptoms)		(symptoms)					pinprik		(signs)	(signs)	(signs)	(signs)	(signs)	(signs)	ROM (signs)
																		(symptoms)													NRS (signs)
1	32	1974	Female	CRPS+	2.36667	1.625	Control	1	506	3	9	1	1	2	2	3	1	1	1	1	1	1	1	1	1	0	2	2	0	2	1	1	1	1	0	0	1	0	1
2	19	1987	Female	CRPS+	2.93333	1.68	Hyper-Sensitive	1	490	3	8	2	1	2	2	3	1	1	1	1	1	1	1	1	1	0	2	2	1	3	1	1	1	1	0	1	1	1	1
3	21	1985	Male	CRPS+	2.22581	1.84	Control	1	265	3	9	2	2	2	2	3	1	1	1	1	1	1	1	1	1	1	3	1	2	3	1	1	1	0	1	1	1	1	1
4	37	1970	Male	CRPS+	2.09677	2.08	Control	1	289	5	9	2	2	2	1	3	1	1	1	1	0	1	1	1	1	1	3	1	2	3	1	1	0	1	1	1	1	1	1
5	35	1972	Male	CRPS+	1.64516	1.8	Control	1	92	5	2	1	2	2	2	3	1	1	1	1	1	1	1	1	1	1	2	2	2	3	0	1	1	1	1	1	1	1	1
6	19	1987	Male	CRPS+	1.54839	2.2	Control	1	118	5	2	2	2	2	2	3	1	1	1	1	1	1	1	1	1	1	3	2	2	3	1	1	1	1	1	1	1	1	1
7	36	1970	Male	CRPS+	1.93548	2.24	Control	2	1318	3	9	2	2	2	2	3	1	1	1	1	1	1	1	1	1	1	3	1	1	3	1	1	0	1	1	0	1	1	1
8	20	1987	Male	CRPS+	1.93548	2.28	Control	1	52	1	9	1	1	2	2	3	1	0	1	1	1	1	1	1	1	1	2	2	2	3	1	1	1	1	1	1	1	1	1
9	25	1981	Male	CRPS+	2.5	2.84	Hyper and Hypo Sensitive	1	1416	5	9	1	1	2	2	3	1	1	1	1	1	1	1	1	1	0	2	1	1	3	1	1	0	1	1	0	1	1	1
10	22	1985	Male	CRPS+	1.74194	1.8	Control	1	168	2	7	2	1	2	2	2	1	1	1	1	1	1	0	1	1	0	2	0	2	2	1	1	0	0	1	1	0	1	1
11	51	1956	Male	CRPS+	2.29032	2.6	Control	1	1764	2	2	2	2	2	2	2	1	1	1	1	1	1	0	1	1	1	2	2	1	2	0	1	1	1	1	0	0	1	1
12	28	1978	Female	CRPS+	1.70968	1.92308	Control	2	3359	5	9	2	2	2	2	3	1	1	1	1	1	1	1	1	1	1	2	2	1	3	1	1	1	1	1	0	1	1	1
13	26	1980	Male	CRPS+	2.3871	2.8	Hypo-Sensitive	1	1798	1	8	2	2	2	2	3	1	1	1	1	1	1	1	1	1	1	2	2	0	3	1	1	1	1	0	0	1	1	1
14	54	1953	Male	CRPS+	2.93548	1.72	Hyper-Sensitive	2	1716	5	9	2	2	2	2	3	1	1	1	1	1	1	1	1	1	1	2	1	0	3	1	1	0	1	0	0	1	1	1
15	22	1985	Male	CRPS+	1.93548	1.88	Control	2	487	1	9	1	2	2	1	3	1	1	1	1	0	1	1	1	1	1	3	1	1	2	1	1	1	0	1	0	0	1	1
16	25	1981	Female	CRPS+	1.77419	1.80769	Control	1	135	1	9	1	2	2	1	3	1	1	1	1	0	1	1	1	1	1	3	1	1	3	1	1	0	1	1	0	1	1	1
17	23	1984	Male	CRPS+	1.74194	2.36	Control	1	493	5	9	2	1	1	2	3	1	1	1	0	1	1	1	1	1	0	2	2	0	3	1	1	1	1	0	0	1	1	1
18	26	1981	Male	CRPS+	1.96774	1.92	Control	2	1441	2	7	1	2	2	1	2	1	1	1	1	1	0	1	1	0	1	3	1	0	2	1	1	1	0	0	0	0	1	1
19	23	1984	Female	CRPS+	2.03226	1.46154	Control	1	737	5	9	2	2	2	2	3	1	1	1	1	1	1	1	1	1	1	3	1	0	3	1	1	0	1	0	0	1	1	1
20	27	1980	Male	CRPS+	2.3871	1.04	Hypo-Sensitive	1	2712	5	2	2	2	2	2	3	1	1	1	1	1	1	1	1	1	1	3	1	1	3	1	1	0	1	0	1	1	1	1
21	21	1985	Female	CRPS+	1.58065	1.57692	Control	1	437	2	2	1	1	1	1	3	1	1	0	1	1	0	1	1	1	0	2	2	2	2	1	1	1	1	1	1	1	1	0
22	21	1984	Female	CRPS+	2.35484	1.69231	Control	1	613	1	9	1	2	2	2	3	1	1	1	1	1	1	1	1	1	1	3	2	1	3	1	1	1	1	1	0	1	1	1
23	23	1983	Male	CRPS+	2.58065	1.8	Hyper-Sensitive	1	457	5	9	2	2	2	1	3	1	1	1	1	1	0	1	1	1	1	3	2	2	2	1	1	1	1	1	1	0	1	1
24	32	1973	Female	CRPS+	2.35484	1.61538	Control	1	4500	3	9	1	2	2	2	2	1	1	1	1	1	1	0	1	1	1	3	2	1	3	1	1	1	1	0	1	1	1	1
25	55	1952	Female	CRPS+	2.51613	1.96154	Hyper-Sensitive	1	385	2	2	2	2	2	2	3	1	1	1	1	1	1	1	1	1	1	1	2	2	3	1	0	1	1	1	1	1	1	1
26	44	1962	Female	CRPS+	2.3871	1.92308	Control	2	759	5	2	2	2	2	2	3	1	1	1	1	1	1	1	1	1	1	2	2	2	3	1	1	1	1	1	1	1	1	1
27	23	1983	Male	CRPS+	1.54839	1.84	Control	1	1066	1	9	1	1	2	2	2	1	1	1	1	1	1	1	1	0	0	3	1	2	3	1	1	1	0	1	1	1	1	1
28	20	1986	Female	CRPS+	1.6129	2.57692	Control	1	234	2	8	1	1	2	2	3	1	1	1	1	1	1	1	1	1	0	2	1	0	3	1	1	0	1	0	0	1	1	1
29	32	1974	Female	CRPS+	1.90323	2.15385	Control	2	666	5	9	1	2	2	2	2	1	1	1	1	1	1	0	1	1	1	3	1	0	2	1	1	1	0	0	0	0	1	1
30	26	1980	Female	CRPS+	2.51613	2.28	Hyper-Sensitive	1	110	3	9	1	2	2	2	3	1	1	1	1	1	1	1	1	1	1	3	1	1	3	1	1	1	0	0	1	1	1	1
31	34	1973	Male	CRPS+	1.74194	1.08	Hypo-Sensitive	1	2901	3	7	2	2	2	2	3	1	1	1	1	1	1	1	1	1	1	3	2	2	3	1	1	1	1	1	1	1	1	1
32	25	1981	Female	CRPS+	2.3871	2.88462	Hypo-Sensitive	1	2002	3	9	2	2	2	2	3	1	1	1	1	1	1	1	1	1	1	2	1	0	3	1	1	1	0	0	0	1	1	1
33	21	1985	Female	CRPS+	2.875	1.5	Hyper-Sensitive	1	3681	1	2	2	2	1	0	3	1	1	1	0	0	0	1	1	1	1	2	0	1	2	1	1	0	0	1	0	0	1	1
34	46	1961	Male	CRPS+	2.29032	1.48	Control	1	3426	3	9	2	2	2	1	3	1	1	1	1	0	1	1	1	1	1	1	1	1	3	0	0	1	0	1	0	1	1	1
35	19	1987	Male	CRPS+	2.90323	2.96	Hyper and Hypo Sensitive	1	163	5	9	1	1	2	1	3	1	1	1	1	0	1	1	1	1	0	3	2	0	3	1	1	1	1	0	0	1	1	1
36	27	1978	Female	CRPS+	2.12903	2.19231	Control	1	980	3	8	2	2	2	2	3	1	1	1	1	1	1	1	1	1	1	2	1	1	3	1	1	0	1	0	1	1	1	1
37	47	1959	Female	CRPS+	2.06452	1.76923	Control	1	80	1	2	2	1	2	1	3	1	1	1	1	0	1	1	1	1	0	3	1	2	3	1	1	0	1	1	1	1	1	1
38	28	1978	Male	CRPS+	2.8125	2.2	Hyper-Sensitive	1	3129	3	2	1	2	2	2	3	1	1	1	1	1	1	1	1	1	1	3	1	0	3	1	1	0	1	0	0	1	1	1
39	61	1945	Male	CRPS+	1.6129	2.12	Control	1	.	3	9	2	1	2	2	3	1	1	1	1	1	1	1	1	1	0	3	2	1	3	1	1	1	1	1	0	1	1	1
40	22	1985	Male	CRPS+	2.80645	2.08	Hyper-Sensitive	1	134	1	8	2	1	2	1	2	1	1	1	1	0	1	1	1	0	0	3	0	2	3	1	1	0	0	1	1	1	1	1
41	39	1968	Male	CRPS+	2.48387	1.92	Hyper-Sensitive	2	744	2	9	2	2	2	2	3	1	1	1	1	1	1	1	1	1	1	2	1	2	3	1	1	0	1	1	1	1	1	1
42	21	1985	Male	CRPS+	2.22581	1.88	Control	1	771	5	9	2	1	2	2	3	1	1	1	1	1	1	1	1	1	0	3	2	0	3	1	1	1	1	0	0	1	1	1
43	23	1984	Male	CRPS+	1.67742	1.72	Control	1	226	3	2	1	1	2	2	3	1	0	1	1	1	1	1	1	1	1	3	2	1	3	1	1	1	1	0	1	1	1	1
44	36	1971	Male	CRPS+	2.25806	1.92	Control	1	208	2	9	1	2	1	1	2	1	1	0	1	1	0	1	0	1	1	3	0	1	1	1	1	0	0	1	0	0	0	1
CC0000	26	.	Male	CRPS-	1.71875	1.88462	Control	.	.	.	.	.	.	.	.	.	.	.	.	.	.	.	.	.	.	.	.	.	.	.	.	.	.	.	.	.	.	.	.
CC0000	25	.	Female	CRPS-	2.53125	1.65385	Hyper-Sensitive	.	.	.	.	.	.	.	.	.	.	.	.	.	.	.	.	.	.	.	.	.	.	.	.	.	.	.	.	.	.	.	.
CC0000	26	.	Male	CRPS-	1.875	2.15385	Control	.	.	.	.	.	.	.	.	.	.	.	.	.	.	.	.	.	.	.	.	.	.	.	.	.	.	.	.	.	.	.	.
CC0000	26	.	Female	CRPS-	2.125	1.92308	Control	.	.	.	.	.	.	.	.	.	.	.	.	.	.	.	.	.	.	.	.	.	.	.	.	.	.	.	.	.	.	.	.
CC0000	24	.	Female	CRPS-	2	2.46154	Control	.	.	.	.	.	.	.	.	.	.	.	.	.	.	.	.	.	.	.	.	.	.	.	.	.	.	.	.	.	.	.	.
CC0000	23	.	Female	CRPS-	1.53125	2.07692	Control	.	.	.	.	.	.	.	.	.	.	.	.	.	.	.	.	.	.	.	.	.	.	.	.	.	.	.	.	.	.	.	.
CC0000	27	.	Female	CRPS-	1.90625	1.76923	Control	.	.	.	.	.	.	.	.	.	.	.	.	.	.	.	.	.	.	.	.	.	.	.	.	.	.	.	.	.	.	.	.
CC0000	24	.	Female	CRPS-	1.53125	1.88462	Control	.	.	.	.	.	.	.	.	.	.	.	.	.	.	.	.	.	.	.	.	.	.	.	.	.	.	.	.	.	.	.	.
CC0000	26	.	Male	CRPS-	2.09375	2.61538	Control	.	.	.	.	.	.	.	.	.	.	.	.	.	.	.	.	.	.	.	.	.	.	.	.	.	.	.	.	.	.	.	.
CC0000	29	.	Male	CRPS-	1.78125	2.30769	Control	.	.	.	.	.	.	.	.	.	.	.	.	.	.	.	.	.	.	.	.	.	.	.	.	.	.	.	.	.	.	.	.
CC0000	25	.	Male	CRPS-	2.15625	2.23077	Control	.	.	.	.	.	.	.	.	.	.	.	.	.	.	.	.	.	.	.	.	.	.	.	.	.	.	.	.	.	.	.	.
CC0000	26	.	Male	CRPS-	1.53125	1.65385	Control	.	.	.	.	.	.	.	.	.	.	.	.	.	.	.	.	.	.	.	.	.	.	.	.	.	.	.	.	.	.	.	.
CC0000	26	.	Male	CRPS-	1.8125	1.46154	Control	.	.	.	.	.	.	.	.	.	.	.	.	.	.	.	.	.	.	.	.	.	.	.	.	.	.	.	.	.	.	.	.
CC0000	23	.	Male	CRPS-	1.875	2.15385	Control	.	.	.	.	.	.	.	.	.	.	.	.	.	.	.	.	.	.	.	.	.	.	.	.	.	.	.	.	.	.	.	.
CC0000	27	.	Male	CRPS-	1.5	1.88462	Control	.	.	.	.	.	.	.	.	.	.	.	.	.	.	.	.	.	.	.	.	.	.	.	.	.	.	.	.	.	.	.	.
CC0000	29	.	Male	CRPS-	2.51613	2.12	Hyper-Sensitive	.	.	.	.	.	.	.	.	.	.	.	.	.	.	.	.	.	.	.	.	.	.	.	.	.	.	.	.	.	.	.	.
CC0000	28	.	Female	CRPS-	2.03226	1.69231	Control	.	.	.	.	.	.	.	.	.	.	.	.	.	.	.	.	.	.	.	.	.	.	.	.	.	.	.	.	.	.	.	.
CC0000	31	.	Female	CRPS-	2.03125	2.46154	Control	.	.	.	.	.	.	.	.	.	.	.	.	.	.	.	.	.	.	.	.	.	.	.	.	.	.	.	.	.	.	.	.
CC0000	31	.	Male	CRPS-	2.625	2.23077	Hyper-Sensitive	.	.	.	.	.	.	.	.	.	.	.	.	.	.	.	.	.	.	.	.	.	.	.	.	.	.	.	.	.	.	.	.
CC0000	32	.	Male	CRPS-	2.09375	1.80769	Control	.	.	.	.	.	.	.	.	.	.	.	.	.	.	.	.	.	.	.	.	.	.	.	.	.	.	.	.	.	.	.	.
CC0000	26	.	Female	CRPS-	1.59375	1.88462	Control	.	.	.	.	.	.	.	.	.	.	.	.	.	.	.	.	.	.	.	.	.	.	.	.	.	.	.	.	.	.	.	.
CC0000	26	.	Male	CRPS-	2.16129	2.24	Control	.	.	.	.	.	.	.	.	.	.	.	.	.	.	.	.	.	.	.	.	.	.	.	.	.	.	.	.	.	.	.	.
CC0000	29	.	Male	CRPS-	2.26667	2.32	Control	.	.	.	.	.	.	.	.	.	.	.	.	.	.	.	.	.	.	.	.	.	.	.	.	.	.	.	.	.	.	.	.
CC0000	24	.	Female	CRPS-	1.96774	1.96154	Control	.	.	.	.	.	.	.	.	.	.	.	.	.	.	.	.	.	.	.	.	.	.	.	.	.	.	.	.	.	.	.	.
CC0000	24	.	Female	CRPS-	2.03125	2.03846	Control	.	.	.	.	.	.	.	.	.	.	.	.	.	.	.	.	.	.	.	.	.	.	.	.	.	.	.	.	.	.	.	.
CC0000	25	.	Female	CRPS-	1.96875	1.88462	Control	.	.	.	.	.	.	.	.	.	.	.	.	.	.	.	.	.	.	.	.	.	.	.	.	.	.	.	.	.	.	.	.
CC0000	26	.	Male	CRPS-	1.74194	2.2	Control	.	.	.	.	.	.	.	.	.	.	.	.	.	.	.	.	.	.	.	.	.	.	.	.	.	.	.	.	.	.	.	.
CC0000	38	.	Female	CRPS-	1.90323	2.15385	Control	.	.	.	.	.	.	.	.	.	.	.	.	.	.	.	.	.	.	.	.	.	.	.	.	.	.	.	.	.	.	.	.
CC0000	26	.	Male	CRPS-	2.03226	2.56	Control	.	.	.	.	.	.	.	.	.	.	.	.	.	.	.	.	.	.	.	.	.	.	.	.	.	.	.	.	.	.	.	.
CC0000	27	.	Male	CRPS-	1.70968	2.52	Control	.	.	.	.	.	.	.	.	.	.	.	.	.	.	.	.	.	.	.	.	.	.	.	.	.	.	.	.	.	.	.	.
CC0000	27	.	Male	CRPS-	1.9375	2.52	Control	.	.	.	.	.	.	.	.	.	.	.	.	.	.	.	.	.	.	.	.	.	.	.	.	.	.	.	.	.	.	.	.
CC0000	29	.	Male	CRPS-	1.54839	2.24	Control	.	.	.	.	.	.	.	.	.	.	.	.	.	.	.	.	.	.	.	.	.	.	.	.	.	.	.	.	.	.	.	.
CC0000	27	.	Female	CRPS-	2.09677	2.69231	Control	.	.	.	.	.	.	.	.	.	.	.	.	.	.	.	.	.	.	.	.	.	.	.	.	.	.	.	.	.	.	.	.
CC0000	27	.	Female	CRPS-	2.35484	1.80769	Control	.	.	.	.	.	.	.	.	.	.	.	.	.	.	.	.	.	.	.	.	.	.	.	.	.	.	.	.	.	.	.	.
CC0000	27	.	Female	CRPS-	1.70968	1.73077	Control	.	.	.	.	.	.	.	.	.	.	.	.	.	.	.	.	.	.	.	.	.	.	.	.	.	.	.	.	.	.	.	.
CC0000	24	.	Female	CRPS-	1.74194	1.53846	Control	.	.	.	.	.	.	.	.	.	.	.	.	.	.	.	.	.	.	.	.	.	.	.	.	.	.	.	.	.	.	.	.
CC0000	29	.	Male	CRPS-	1.41935	1.52	Control	.	.	.	.	.	.	.	.	.	.	.	.	.	.	.	.	.	.	.	.	.	.	.	.	.	.	.	.	.	.	.	.
CC0000	25	.	Female	CRPS-	2.0625	1.88462	Control	.	.	.	.	.	.	.	.	.	.	.	.	.	.	.	.	.	.	.	.	.	.	.	.	.	.	.	.	.	.	.	.
CC0000	25	.	Male	CRPS-	2.29032	2.04	Control	.	.	.	.	.	.	.	.	.	.	.	.	.	.	.	.	.	.	.	.	.	.	.	.	.	.	.	.	.	.	.	.
CC0000	26	.	Male	CRPS-	2.09677	2.4	Control	.	.	.	.	.	.	.	.	.	.	.	.	.	.	.	.	.	.	.	.	.	.	.	.	.	.	.	.	.	.	.	.
CC0000	35	.	Male	CRPS-	2.3871	1.68	Control	.	.	.	.	.	.	.	.	.	.	.	.	.	.	.	.	.	.	.	.	.	.	.	.	.	.	.	.	.	.	.	.
CC0000	25	.	Female	CRPS-	2.12903	1.92308	Control	.	.	.	.	.	.	.	.	.	.	.	.	.	.	.	.	.	.	.	.	.	.	.	.	.	.	.	.	.	.	.	.
CC0000	25	.	Female	CRPS-	1.6875	2.38462	Control	.	.	.	.	.	.	.	.	.	.	.	.	.	.	.	.	.	.	.	.	.	.	.	.	.	.	.	.	.	.	.	.
CC0000	24	.	Female	CRPS-	2.03125	2.65385	Control	.	.	.	.	.	.	.	.	.	.	.	.	.	.	.	.	.	.	.	.	.	.	.	.	.	.	.	.	.	.	.	.
CC0000	28	.	Female	CRPS-	2.03125	1.88462	Control	.	.	.	.	.	.	.	.	.	.	.	.	.	.	.	.	.	.	.	.	.	.	.	.	.	.	.	.	.	.	.	.
CC0000	29	.	Female	CRPS-	1.9375	2.42308	Control	.	.	.	.	.	.	.	.	.	.	.	.	.	.	.	.	.	.	.	.	.	.	.	.	.	.	.	.	.	.	.	.
CC0000	28	.	Male	CRPS-	2.03125	2.57692	Control	.	.	.	.	.	.	.	.	.	.	.	.	.	.	.	.	.	.	.	.	.	.	.	.	.	.	.	.	.	.	.	.
CC0000	24	.	Female	CRPS-	2	2.08	Control	.	.	.	.	.	.	.	.	.	.	.	.	.	.	.	.	.	.	.	.	.	.	.	.	.	.	.	.	.	.	.	.
CC0000	32	.	Female	CRPS-	1.93548	2.07692	Control	.	.	.	.	.	.	.	.	.	.	.	.	.	.	.	.	.	.	.	.	.	.	.	.	.	.	.	.	.	.	.	.
CC0000	30	.	Male	CRPS-	1.875	2	Control	.	.	.	.	.	.	.	.	.	.	.	.	.	.	.	.	.	.	.	.	.	.	.	.	.	.	.	.	.	.	.	.
CC0000	28	.	Male	CRPS-	2.34375	2.38462	Control	.	.	.	.	.	.	.	.	.	.	.	.	.	.	.	.	.	.	.	.	.	.	.	.	.	.	.	.	.	.	.	.
CC0000	27	.	Male	CRPS-	1.59375	2.6	Control	.	.	.	.	.	.	.	.	.	.	.	.	.	.	.	.	.	.	.	.	.	.	.	.	.	.	.	.	.	.	.	.
CC0000	27	.	Male	CRPS-	1.84375	2.53846	Control	.	.	.	.	.	.	.	.	.	.	.	.	.	.	.	.	.	.	.	.	.	.	.	.	.	.	.	.	.	.	.	.
CC0000	23	.	Female	CRPS-	1.53125	2.03846	Control	.	.	.	.	.	.	.	.	.	.	.	.	.	.	.	.	.	.	.	.	.	.	.	.	.	.	.	.	.	.	.	.
CC0000	27	.	Male	CRPS-	1.625	2.53846	Control	.	.	.	.	.	.	.	.	.	.	.	.	.	.	.	.	.	.	.	.	.	.	.	.	.	.	.	.	.	.	.	.
CC0000	33	.	Female	CRPS-	1.75	1.76923	Control	.	.	.	.	.	.	.	.	.	.	.	.	.	.	.	.	.	.	.	.	.	.	.	.	.	.	.	.	.	.	.	.
CC0000	24	.	Female	CRPS-	1.625	2.34615	Control	.	.	.	.	.	.	.	.	.	.	.	.	.	.	.	.	.	.	.	.	.	.	.	.	.	.	.	.	.	.	.	.
CC0000	28	.	Female	CRPS-	2.03125	1.96154	Control	.	.	.	.	.	.	.	.	.	.	.	.	.	.	.	.	.	.	.	.	.	.	.	.	.	.	.	.	.	.	.	.
CC0000	31	.	Male	CRPS-	2.09375	2.46154	Control	.	.	.	.	.	.	.	.	.	.	.	.	.	.	.	.	.	.	.	.	.	.	.	.	.	.	.	.	.	.	.	.
CC0000	35	.	Female	CRPS-	1.53125	2.03846	Control	.	.	.	.	.	.	.	.	.	.	.	.	.	.	.	.	.	.	.	.	.	.	.	.	.	.	.	.	.	.	.	.
CC0000	34	.	Female	CRPS-	2.59375	1.69231	Hyper-Sensitive	.	.	.	.	.	.	.	.	.	.	.	.	.	.	.	.	.	.	.	.	.	.	.	.	.	.	.	.	.	.	.	.
CC0000	23	.	Male	CRPS-	1.93333	2.30769	Control	.	.	.	.	.	.	.	.	.	.	.	.	.	.	.	.	.	.	.	.	.	.	.	.	.	.	.	.	.	.	.	.
CC0000	40	.	Female	CRPS-	2.59375	2.57692	Hyper-Sensitive	.	.	.	.	.	.	.	.	.	.	.	.	.	.	.	.	.	.	.	.	.	.	.	.	.	.	.	.	.	.	.	.
CC0000	25	.	Female	CRPS-	1.75	2.57692	Control	.	.	.	.	.	.	.	.	.	.	.	.	.	.	.	.	.	.	.	.	.	.	.	.	.	.	.	.	.	.	.	.
CC0000	28	.	Female	CRPS-	2.71875	1.73077	Hyper-Sensitive	.	.	.	.	.	.	.	.	.	.	.	.	.	.	.	.	.	.	.	.	.	.	.	.	.	.	.	.	.	.	.	.
CC0000	32	.	Female	CRPS-	1.6875	2.03846	Control	.	.	.	.	.	.	.	.	.	.	.	.	.	.	.	.	.	.	.	.	.	.	.	.	.	.	.	.	.	.	.	.
CC0000	32	.	Male	CRPS-	1.8125	1.76923	Control	.	.	.	.	.	.	.	.	.	.	.	.	.	.	.	.	.	.	.	.	.	.	.	.	.	.	.	.	.	.	.	.
CC0000	28	.	Female	CRPS-	1.875	2.26923	Control	.	.	.	.	.	.	.	.	.	.	.	.	.	.	.	.	.	.	.	.	.	.	.	.	.	.	.	.	.	.	.	.
CC0001	28	.	Male	CRPS-	2.40625	1.65385	Hyper-Sensitive	.	.	.	.	.	.	.	.	.	.	.	.	.	.	.	.	.	.	.	.	.	.	.	.	.	.	.	.	.	.	.	.
CC0001	25	.	Male	CRPS-	2.3871	2.07692	Control	.	.	.	.	.	.	.	.	.	.	.	.	.	.	.	.	.	.	.	.	.	.	.	.	.	.	.	.	.	.	.	.
CC0001	25	.	Male	CRPS-	1.28125	2.19231	Hyper-Sensitive	.	.	.	.	.	.	.	.	.	.	.	.	.	.	.	.	.	.	.	.	.	.	.	.	.	.	.	.	.	.	.	.
CC0001	38	.	Male	CRPS-	1.84375	2	Control	.	.	.	.	.	.	.	.	.	.	.	.	.	.	.	.	.	.	.	.	.	.	.	.	.	.	.	.	.	.	.	.
CC0001	26	.	Female	CRPS-	1.71875	1.96154	Control	.	.	.	.	.	.	.	.	.	.	.	.	.	.	.	.	.	.	.	.	.	.	.	.	.	.	.	.	.	.	.	.
CC0001	28	.	Male	CRPS-	2.21875	2.11538	Control	.	.	.	.	.	.	.	.	.	.	.	.	.	.	.	.	.	.	.	.	.	.	.	.	.	.	.	.	.	.	.	.
CC0001	30	.	Male	CRPS-	1.5	2.15385	Control	.	.	.	.	.	.	.	.	.	.	.	.	.	.	.	.	.	.	.	.	.	.	.	.	.	.	.	.	.	.	.	.
CC0001	35	.	Male	CRPS-	2.3125	2.11538	Control	.	.	.	.	.	.	.	.	.	.	.	.	.	.	.	.	.	.	.	.	.	.	.	.	.	.	.	.	.	.	.	.
CC0001	25	.	Male	CRPS-	2.16129	1.88	Control	.	.	.	.	.	.	.	.	.	.	.	.	.	.	.	.	.	.	.	.	.	.	.	.	.	.	.	.	.	.	.	.
CC0001	23	.	Female	CRPS-	1.51613	2.30769	Control	.	.	.	.	.	.	.	.	.	.	.	.	.	.	.	.	.	.	.	.	.	.	.	.	.	.	.	.	.	.	.	.
CC0001	35	.	Male	CRPS-	1.48387	1.88	Control	.	.	.	.	.	.	.	.	.	.	.	.	.	.	.	.	.	.	.	.	.	.	.	.	.	.	.	.	.	.	.	.
CC0001	24	.	Male	CRPS-	1.87097	2.08	Control	.	.	.	.	.	.	.	.	.	.	.	.	.	.	.	.	.	.	.	.	.	.	.	.	.	.	.	.	.	.	.	.
CC0001	28	.	Male	CRPS-	1.87097	2	Control	.	.	.	.	.	.	.	.	.	.	.	.	.	.	.	.	.	.	.	.	.	.	.	.	.	.	.	.	.	.	.	.
CC0001	24	.	Female	CRPS-	1.46875	2	Control	.	.	.	.	.	.	.	.	.	.	.	.	.	.	.	.	.	.	.	.	.	.	.	.	.	.	.	.	.	.	.	.
CC0001	26	.	Male	CRPS-	2.32258	1.625	Control	.	.	.	.	.	.	.	.	.	.	.	.	.	.	.	.	.	.	.	.	.	.	.	.	.	.	.	.	.	.	.	.
CC0001	26	.	Male	CRPS-	1.83871	2.12	Control	.	.	.	.	.	.	.	.	.	.	.	.	.	.	.	.	.	.	.	.	.	.	.	.	.	.	.	.	.	.	.	.
CC0001	23	.	Female	CRPS-	2.16667	2.07692	Control	.	.	.	.	.	.	.	.	.	.	.	.	.	.	.	.	.	.	.	.	.	.	.	.	.	.	.	.	.	.	.	.
CC0001	23	.	Female	CRPS-	2.25806	1.96154	Control	.	.	.	.	.	.	.	.	.	.	.	.	.	.	.	.	.	.	.	.	.	.	.	.	.	.	.	.	.	.	.	.
CC0001	24	.	Female	CRPS-	1.78125	2.15385	Control	.	.	.	.	.	.	.	.	.	.	.	.	.	.	.	.	.	.	.	.	.	.	.	.	.	.	.	.	.	.	.	.
CC0001	23	.	Male	CRPS-	1.54839	2.28	Control	.	.	.	.	.	.	.	.	.	.	.	.	.	.	.	.	.	.	.	.	.	.	.	.	.	.	.	.	.	.	.	.
CC0001	39	.	Male	CRPS-	2	1.73077	Control	.	.	.	.	.	.	.	.	.	.	.	.	.	.	.	.	.	.	.	.	.	.	.	.	.	.	.	.	.	.	.	.
CC0001	27	.	Male	CRPS-	1.375	2.23077	Control	.	.	.	.	.	.	.	.	.	.	.	.	.	.	.	.	.	.	.	.	.	.	.	.	.	.	.	.	.	.	.	.
CC0001	29	.	Male	CRPS-	2.125	1.84615	Control	.	.	.	.	.	.	.	.	.	.	.	.	.	.	.	.	.	.	.	.	.	.	.	.	.	.	.	.	.	.	.	.
CC0001	29	.	Female	CRPS-	2.125	1.42308	Hypo-Sensitive	.	.	.	.	.	.	.	.	.	.	.	.	.	.	.	.	.	.	.	.	.	.	.	.	.	.	.	.	.	.	.	.
CC0001	29	.	Female	CRPS-	1.6875	2.15385	Control	.	.	.	.	.	.	.	.	.	.	.	.	.	.	.	.	.	.	.	.	.	.	.	.	.	.	.	.	.	.	.	.
CC0001	24	.	Female	CRPS-	1.78125	2.15385	Control	.	.	.	.	.	.	.	.	.	.	.	.	.	.	.	.	.	.	.	.	.	.	.	.	.	.	.	.	.	.	.	.
CC0001	23	.	Female	CRPS-	2.34375	2.57692	Control	.	.	.	.	.	.	.	.	.	.	.	.	.	.	.	.	.	.	.	.	.	.	.	.	.	.	.	.	.	.	.	.
CC0001	26	.	Female	CRPS-	1.625	2.03846	Control	.	.	.	.	.	.	.	.	.	.	.	.	.	.	.	.	.	.	.	.	.	.	.	.	.	.	.	.	.	.	.	.
CC0001	28	.	Male	CRPS-	1.75	2.53846	Control	.	.	.	.	.	.	.	.	.	.	.	.	.	.	.	.	.	.	.	.	.	.	.	.	.	.	.	.	.	.	.	.
CC0001	35	.	Male	CRPS-	2.125	2.57692	Control	.	.	.	.	.	.	.	.	.	.	.	.	.	.	.	.	.	.	.	.	.	.	.	.	.	.	.	.	.	.	.	.
CC0001	24	.	Female	CRPS-	1.25	2.03846	Hyper-Sensitive	.	.	.	.	.	.	.	.	.	.	.	.	.	.	.	.	.	.	.	.	.	.	.	.	.	.	.	.	.	.	.	.
CC0001	24	.	Male	CRPS-	1.625	2.57692	Control	.	.	.	.	.	.	.	.	.	.	.	.	.	.	.	.	.	.	.	.	.	.	.	.	.	.	.	.	.	.	.	.
CC0001	34	.	Male	CRPS-	1.78125	2.61538	Control	.	.	.	.	.	.	.	.	.	.	.	.	.	.	.	.	.	.	.	.	.	.	.	.	.	.	.	.	.	.	.	.
CC0001	26	.	Male	CRPS-	1.9375	2.46154	Control	.	.	.	.	.	.	.	.	.	.	.	.	.	.	.	.	.	.	.	.	.	.	.	.	.	.	.	.	.	.	.	.
CC0001	24	.	Female	CRPS-	2.78125	1.34615	Hyper and Hypo Sensitive	.	.	.	.	.	.	.	.	.	.	.	.	.	.	.	.	.	.	.	.	.	.	.	.	.	.	.	.	.	.	.	.
CC0001	23	.	Female	CRPS-	1.875	2.19231	Control	.	.	.	.	.	.	.	.	.	.	.	.	.	.	.	.	.	.	.	.	.	.	.	.	.	.	.	.	.	.	.	.
CC0001	31	.	Female	CRPS-	2.03125	2.03846	Control	.	.	.	.	.	.	.	.	.	.	.	.	.	.	.	.	.	.	.	.	.	.	.	.	.	.	.	.	.	.	.	.
CC0001	26	.	Female	CRPS-	1.53125	2.42308	Control	.	.	.	.	.	.	.	.	.	.	.	.	.	.	.	.	.	.	.	.	.	.	.	.	.	.	.	.	.	.	.	.
CC0001	27	.	Female	CRPS-	1.74194	1.96154	Control	.	.	.	.	.	.	.	.	.	.	.	.	.	.	.	.	.	.	.	.	.	.	.	.	.	.	.	.	.	.	.	.
CC0001	26	.	Male	CRPS-	1.875	2.53846	Control	.	.	.	.	.	.	.	.	.	.	.	.	.	.	.	.	.	.	.	.	.	.	.	.	.	.	.	.	.	.	.	.
CC0001	24	.	Female	CRPS-	1.625	2.15385	Control	.	.	.	.	.	.	.	.	.	.	.	.	.	.	.	.	.	.	.	.	.	.	.	.	.	.	.	.	.	.	.	.
CC0001	25	.	Female	CRPS-	1.8125	2.30769	Control	.	.	.	.	.	.	.	.	.	.	.	.	.	.	.	.	.	.	.	.	.	.	.	.	.	.	.	.	.	.	.	.
CC0001	27	.	Female	CRPS-	2.46875	2.80769	Hyper and Hypo Sensitive	.	.	.	.	.	.	.	.	.	.	.	.	.	.	.	.	.	.	.	.	.	.	.	.	.	.	.	.	.	.	.	.
CC0001	23	.	Female	CRPS-	2.03125	2.5	Control	.	.	.	.	.	.	.	.	.	.	.	.	.	.	.	.	.	.	.	.	.	.	.	.	.	.	.	.	.	.	.	.
CC0001	28	.	Female	CRPS-	2.75	2.76923	Hyper-Sensitive	.	.	.	.	.	.	.	.	.	.	.	.	.	.	.	.	.	.	.	.	.	.	.	.	.	.	.	.	.	.	.	.
CC0001	26	.	Male	CRPS-	1.625	1.96154	Control	.	.	.	.	.	.	.	.	.	.	.	.	.	.	.	.	.	.	.	.	.	.	.	.	.	.	.	.	.	.	.	.
CC0001	23	.	Male	CRPS-	1.96875	1.80769	Control	.	.	.	.	.	.	.	.	.	.	.	.	.	.	.	.	.	.	.	.	.	.	.	.	.	.	.	.	.	.	.	.
CC0001	23	.	Female	CRPS-	1.875	2.73077	Control	.	.	.	.	.	.	.	.	.	.	.	.	.	.	.	.	.	.	.	.	.	.	.	.	.	.	.	.	.	.	.	.
CC0001	25	.	Male	CRPS-	2.21875	1.88462	Control	.	.	.	.	.	.	.	.	.	.	.	.	.	.	.	.	.	.	.	.	.	.	.	.	.	.	.	.	.	.	.	.
CC0001	25	.	Female	CRPS-	1.71875	1.76923	Control	.	.	.	.	.	.	.	.	.	.	.	.	.	.	.	.	.	.	.	.	.	.	.	.	.	.	.	.	.	.	.	.
CC0001	25	.	Female	CRPS-	1.84375	1.80769	Control	.	.	.	.	.	.	.	.	.	.	.	.	.	.	.	.	.	.	.	.	.	.	.	.	.	.	.	.	.	.	.	.
CC0001	26	.	Female	CRPS-	2.1875	1.73077	Control	.	.	.	.	.	.	.	.	.	.	.	.	.	.	.	.	.	.	.	.	.	.	.	.	.	.	.	.	.	.	.	.
CC0001	23	.	Female	CRPS-	2.15625	2.30769	Control	.	.	.	.	.	.	.	.	.	.	.	.	.	.	.	.	.	.	.	.	.	.	.	.	.	.	.	.	.	.	.	.
CC0001	24	.	Female	CRPS-	2.375	2.07692	Control	.	.	.	.	.	.	.	.	.	.	.	.	.	.	.	.	.	.	.	.	.	.	.	.	.	.	.	.	.	.	.	.
CC0001	23	.	Female	CRPS-	2.09677	1.61538	Control	.	.	.	.	.	.	.	.	.	.	.	.	.	.	.	.	.	.	.	.	.	.	.	.	.	.	.	.	.	.	.	.
CC0001	23	.	Female	CRPS-	1.65625	1.88462	Control	.	.	.	.	.	.	.	.	.	.	.	.	.	.	.	.	.	.	.	.	.	.	.	.	.	.	.	.	.	.	.	.
CC0001	24	.	Female	CRPS-	1.96875	2.19231	Control	.	.	.	.	.	.	.	.	.	.	.	.	.	.	.	.	.	.	.	.	.	.	.	.	.	.	.	.	.	.	.	.
CC0001	24	.	Female	CRPS-	1.625	2.19231	Control	.	.	.	.	.	.	.	.	.	.	.	.	.	.	.	.	.	.	.	.	.	.	.	.	.	.	.	.	.	.	.	.
CC0001	25	.	Male	CRPS-	1.8125	2.32	Control	.	.	.	.	.	.	.	.	.	.	.	.	.	.	.	.	.	.	.	.	.	.	.	.	.	.	.	.	.	.	.	.
CC0001	26	.	Male	CRPS-	1.90625	2.23077	Control	.	.	.	.	.	.	.	.	.	.	.	.	.	.	.	.	.	.	.	.	.	.	.	.	.	.	.	.	.	.	.	.
CC0001	26	.	Male	CRPS-	2.125	2.68	Control	.	.	.	.	.	.	.	.	.	.	.	.	.	.	.	.	.	.	.	.	.	.	.	.	.	.	.	.	.	.	.	.
CC0001	28	.	Female	CRPS-	2.375	2.19231	Control	.	.	.	.	.	.	.	.	.	.	.	.	.	.	.	.	.	.	.	.	.	.	.	.	.	.	.	.	.	.	.	.
CC0001	26	.	Male	CRPS-	2.125	2.15385	Control	.	.	.	.	.	.	.	.	.	.	.	.	.	.	.	.	.	.	.	.	.	.	.	.	.	.	.	.	.	.	.	.
CC0002	29	.	Male	CRPS-	1.9375	2.4	Control	.	.	.	.	.	.	.	.	.	.	.	.	.	.	.	.	.	.	.	.	.	.	.	.	.	.	.	.	.	.	.	.
CC0002	26	.	Male	CRPS-	2.125	2.42308	Control	.	.	.	.	.	.	.	.	.	.	.	.	.	.	.	.	.	.	.	.	.	.	.	.	.	.	.	.	.	.	.	.
CC0002	25	.	Male	CRPS-	2.125	2.56	Control	.	.	.	.	.	.	.	.	.	.	.	.	.	.	.	.	.	.	.	.	.	.	.	.	.	.	.	.	.	.	.	.
CC0002	26	.	Male	CRPS-	1.53125	2.61538	Control	.	.	.	.	.	.	.	.	.	.	.	.	.	.	.	.	.	.	.	.	.	.	.	.	.	.	.	.	.	.	.	.
CC0002	26	.	Male	CRPS-	2.09375	2.24	Control	.	.	.	.	.	.	.	.	.	.	.	.	.	.	.	.	.	.	.	.	.	.	.	.	.	.	.	.	.	.	.	.
CC0002	24	.	Female	CRPS-	1.5	2.15385	Control	.	.	.	.	.	.	.	.	.	.	.	.	.	.	.	.	.	.	.	.	.	.	.	.	.	.	.	.	.	.	.	.
CC0002	26	.	Female	CRPS-	1.53125	2.69231	Control	.	.	.	.	.	.	.	.	.	.	.	.	.	.	.	.	.	.	.	.	.	.	.	.	.	.	.	.	.	.	.	.
CC0002	23	.	Female	CRPS-	2.22581	2	Control	.	.	.	.	.	.	.	.	.	.	.	.	.	.	.	.	.	.	.	.	.	.	.	.	.	.	.	.	.	.	.	.
CC0002	23	.	Female	CRPS-	1.80645	2	Control	.	.	.	.	.	.	.	.	.	.	.	.	.	.	.	.	.	.	.	.	.	.	.	.	.	.	.	.	.	.	.	.
CC0002	23	.	Female	CRPS-	1.71875	2.15385	Control	.	.	.	.	.	.	.	.	.	.	.	.	.	.	.	.	.	.	.	.	.	.	.	.	.	.	.	.	.	.	.	.
CC0002	35	.	Male	CRPS-	1.34375	2.19231	Hyper-Sensitive	.	.	.	.	.	.	.	.	.	.	.	.	.	.	.	.	.	.	.	.	.	.	.	.	.	.	.	.	.	.	.	.
CC0002	39	.	Female	CRPS-	1.53125	2.19231	Control	.	.	.	.	.	.	.	.	.	.	.	.	.	.	.	.	.	.	.	.	.	.	.	.	.	.	.	.	.	.	.	.
CC0002	35	.	Female	CRPS-	1.75	1.61538	Control	.	.	.	.	.	.	.	.	.	.	.	.	.	.	.	.	.	.	.	.	.	.	.	.	.	.	.	.	.	.	.	.
CC0002	33	.	Male	CRPS-	1.65625	2.19231	Control	.	.	.	.	.	.	.	.	.	.	.	.	.	.	.	.	.	.	.	.	.	.	.	.	.	.	.	.	.	.	.	.
CC0002	30	.	Female	CRPS-	1.53125	2.38462	Control	.	.	.	.	.	.	.	.	.	.	.	.	.	.	.	.	.	.	.	.	.	.	.	.	.	.	.	.	.	.	.	.
CC0002	31	.	Female	CRPS-	1.9375	1.84615	Control	.	.	.	.	.	.	.	.	.	.	.	.	.	.	.	.	.	.	.	.	.	.	.	.	.	.	.	.	.	.	.	.
CC0002	32	.	Male	CRPS-	1.65625	2.34615	Control	.	.	.	.	.	.	.	.	.	.	.	.	.	.	.	.	.	.	.	.	.	.	.	.	.	.	.	.	.	.	.	.
CC0002	29	.	Male	CRPS-	1.84375	1.92308	Control	.	.	.	.	.	.	.	.	.	.	.	.	.	.	.	.	.	.	.	.	.	.	.	.	.	.	.	.	.	.	.	.
CC0002	25	.	Male	CRPS-	2.40625	2.23077	Hyper-Sensitive	.	.	.	.	.	.	.	.	.	.	.	.	.	.	.	.	.	.	.	.	.	.	.	.	.	.	.	.	.	.	.	.
CC0002	28	.	Female	CRPS-	2.09375	1.44	Control	.	.	.	.	.	.	.	.	.	.	.	.	.	.	.	.	.	.	.	.	.	.	.	.	.	.	.	.	.	.	.	.
CC0002	25	.	Male	CRPS-	1.5	2	Control	.	.	.	.	.	.	.	.	.	.	.	.	.	.	.	.	.	.	.	.	.	.	.	.	.	.	.	.	.	.	.	.
CC0002	26	.	Male	CRPS-	1.9375	2.88462	Hypo-Sensitive	.	.	.	.	.	.	.	.	.	.	.	.	.	.	.	.	.	.	.	.	.	.	.	.	.	.	.	.	.	.	.	.
CC0002	26	.	Male	CRPS-	1.90625	1.96154	Control	.	.	.	.	.	.	.	.	.	.	.	.	.	.	.	.	.	.	.	.	.	.	.	.	.	.	.	.	.	.	.	.
CC0002	28	.	Female	CRPS-	1.93548	2.19231	Control	.	.	.	.	.	.	.	.	.	.	.	.	.	.	.	.	.	.	.	.	.	.	.	.	.	.	.	.	.	.	.	.
CC0002	25	.	Male	CRPS-	1.90625	1.92308	Control	.	.	.	.	.	.	.	.	.	.	.	.	.	.	.	.	.	.	.	.	.	.	.	.	.	.	.	.	.	.	.	.
CC0002	25	.	Male	CRPS-	1.9375	1.84615	Control	.	.	.	.	.	.	.	.	.	.	.	.	.	.	.	.	.	.	.	.	.	.	.	.	.	.	.	.	.	.	.	.
CC0002	23	.	Male	CRPS-	1.53125	2	Control	.	.	.	.	.	.	.	.	.	.	.	.	.	.	.	.	.	.	.	.	.	.	.	.	.	.	.	.	.	.	.	.
CC0002	24	.	Male	CRPS-	1.5625	2.23077	Control	.	.	.	.	.	.	.	.	.	.	.	.	.	.	.	.	.	.	.	.	.	.	.	.	.	.	.	.	.	.	.	.
CC0002	24	.	Male	CRPS-	1.75	2.11538	Control	.	.	.	.	.	.	.	.	.	.	.	.	.	.	.	.	.	.	.	.	.	.	.	.	.	.	.	.	.	.	.	.
CC0002	23	.	Male	CRPS-	2.0625	1.80769	Control	.	.	.	.	.	.	.	.	.	.	.	.	.	.	.	.	.	.	.	.	.	.	.	.	.	.	.	.	.	.	.	.
CC0002	23	.	Male	CRPS-	1.9375	2.15385	Control	.	.	.	.	.	.	.	.	.	.	.	.	.	.	.	.	.	.	.	.	.	.	.	.	.	.	.	.	.	.	.	.
CC0002	26	.	Female	CRPS-	2.125	1.80769	Control	.	.	.	.	.	.	.	.	.	.	.	.	.	.	.	.	.	.	.	.	.	.	.	.	.	.	.	.	.	.	.	.
CC0002	31	.	Male	CRPS-	2.03125	2.11538	Control	.	.	.	.	.	.	.	.	.	.	.	.	.	.	.	.	.	.	.	.	.	.	.	.	.	.	.	.	.	.	.	.
CC0002	.	.	Female	CRPS-	2.28125	2.46154	Control	.	.	.	.	.	.	.	.	.	.	.	.	.	.	.	.	.	.	.	.	.	.	.	.	.	.	.	.	.	.	.	.
CC0002	25	.	Female	CRPS-	1.8125	2.34615	Control	.	.	.	.	.	.	.	.	.	.	.	.	.	.	.	.	.	.	.	.	.	.	.	.	.	.	.	.	.	.	.	.
CC0002	25	.	Male	CRPS-	2.5625	2.30769	Hyper-Sensitive	.	.	.	.	.	.	.	.	.	.	.	.	.	.	.	.	.	.	.	.	.	.	.	.	.	.	.	.	.	.	.	.
CC0002	27	.	Male	CRPS-	1.75	2.26923	Control	.	.	.	.	.	.	.	.	.	.	.	.	.	.	.	.	.	.	.	.	.	.	.	.	.	.	.	.	.	.	.	.
CC0002	32	.	Male	CRPS-	1.71875	2.61538	Control	.	.	.	.	.	.	.	.	.	.	.	.	.	.	.	.	.	.	.	.	.	.	.	.	.	.	.	.	.	.	.	.
CC0002	26	.	Female	CRPS-	1.75	2.34615	Control	.	.	.	.	.	.	.	.	.	.	.	.	.	.	.	.	.	.	.	.	.	.	.	.	.	.	.	.	.	.	.	.
CC0002	30	.	Male	CRPS-	1.3125	1.76923	Hyper-Sensitive	.	.	.	.	.	.	.	.	.	.	.	.	.	.	.	.	.	.	.	.	.	.	.	.	.	.	.	.	.	.	.	.
CC0002	26	.	Female	CRPS-	1.75	2.30769	Control	.	.	.	.	.	.	.	.	.	.	.	.	.	.	.	.	.	.	.	.	.	.	.	.	.	.	.	.	.	.	.	.
CC0002	28	.	Female	CRPS-	2.25	2.5	Control	.	.	.	.	.	.	.	.	.	.	.	.	.	.	.	.	.	.	.	.	.	.	.	.	.	.	.	.	.	.	.	.
CC0002	28	.	Female	CRPS-	1.75	2.38462	Control	.	.	.	.	.	.	.	.	.	.	.	.	.	.	.	.	.	.	.	.	.	.	.	.	.	.	.	.	.	.	.	.
CC0002	30	.	Female	CRPS-	1.80645	2.34615	Control	.	.	.	.	.	.	.	.	.	.	.	.	.	.	.	.	.	.	.	.	.	.	.	.	.	.	.	.	.	.	.	.
CC0002	29	.	Female	CRPS-	2.3125	2.30769	Control	.	.	.	.	.	.	.	.	.	.	.	.	.	.	.	.	.	.	.	.	.	.	.	.	.	.	.	.	.	.	.	.
CC0002	29	.	Male	CRPS-	1.875	1.73077	Control	.	.	.	.	.	.	.	.	.	.	.	.	.	.	.	.	.	.	.	.	.	.	.	.	.	.	.	.	.	.	.	.
CC0002	28	.	Male	CRPS-	1.5	1.92308	Control	.	.	.	.	.	.	.	.	.	.	.	.	.	.	.	.	.	.	.	.	.	.	.	.	.	.	.	.	.	.	.	.
CC0002	29	.	Female	CRPS-	1.6875	2.8	Hypo-Sensitive	.	.	.	.	.	.	.	.	.	.	.	.	.	.	.	.	.	.	.	.	.	.	.	.	.	.	.	.	.	.	.	.
CC0002	30	.	Male	CRPS-	1.5625	1.65385	Control	.	.	.	.	.	.	.	.	.	.	.	.	.	.	.	.	.	.	.	.	.	.	.	.	.	.	.	.	.	.	.	.
CC0002	26	.	Male	CRPS-	1.84375	2.23077	Control	.	.	.	.	.	.	.	.	.	.	.	.	.	.	.	.	.	.	.	.	.	.	.	.	.	.	.	.	.	.	.	.
CC0002	26	.	Female	CRPS-	1.9375	2.23077	Control	.	.	.	.	.	.	.	.	.	.	.	.	.	.	.	.	.	.	.	.	.	.	.	.	.	.	.	.	.	.	.	.
CC0002	30	.	Female	CRPS-	1.96774	2.03846	Control	.	.	.	.	.	.	.	.	.	.	.	.	.	.	.	.	.	.	.	.	.	.	.	.	.	.	.	.	.	.	.	.
CC0002	32	.	Male	CRPS-	1.96774	2.52	Control	.	.	.	.	.	.	.	.	.	.	.	.	.	.	.	.	.	.	.	.	.	.	.	.	.	.	.	.	.	.	.	.
CC0002	26	.	Female	CRPS-	2	2	Control	.	.	.	.	.	.	.	.	.	.	.	.	.	.	.	.	.	.	.	.	.	.	.	.	.	.	.	.	.	.	.	.
CC0002	26	.	Male	CRPS-	1.90323	2.76	Control	.	.	.	.	.	.	.	.	.	.	.	.	.	.	.	.	.	.	.	.	.	.	.	.	.	.	.	.	.	.	.	.
CC0002	26	.	Male	CRPS-	2.16129	1.96	Control	.	.	.	.	.	.	.	.	.	.	.	.	.	.	.	.	.	.	.	.	.	.	.	.	.	.	.	.	.	.	.	.
CC0002	27	.	Male	CRPS-	1.58065	2.64	Control	.	.	.	.	.	.	.	.	.	.	.	.	.	.	.	.	.	.	.	.	.	.	.	.	.	.	.	.	.	.	.	.
CC0002	34	.	Male	CRPS-	1.71875	2.30769	Control	.	.	.	.	.	.	.	.	.	.	.	.	.	.	.	.	.	.	.	.	.	.	.	.	.	.	.	.	.	.	.	.
CC0002	26	.	Male	CRPS-	1.5625	1.92308	Control	.	.	.	.	.	.	.	.	.	.	.	.	.	.	.	.	.	.	.	.	.	.	.	.	.	.	.	.	.	.	.	.
CC0002	26	.	Male	CRPS-	2.48387	2.36	Hyper-Sensitive	.	.	.	.	.	.	.	.	.	.	.	.	.	.	.	.	.	.	.	.	.	.	.	.	.	.	.	.	.	.	.	.
CC0002	29	.	Male	CRPS-	1.34375	2	Hyper-Sensitive	.	.	.	.	.	.	.	.	.	.	.	.	.	.	.	.	.	.	.	.	.	.	.	.	.	.	.	.	.	.	.	.
CC0002	26	.	Female	CRPS-	2.78125	2.69231	Hyper-Sensitive	.	.	.	.	.	.	.	.	.	.	.	.	.	.	.	.	.	.	.	.	.	.	.	.	.	.	.	.	.	.	.	.
CC0002	33	.	Male	CRPS-	1.29032	2.12	Hyper-Sensitive	.	.	.	.	.	.	.	.	.	.	.	.	.	.	.	.	.	.	.	.	.	.	.	.	.	.	.	.	.	.	.	.
CC0002	31	.	Male	CRPS-	2	1.88	Control	.	.	.	.	.	.	.	.	.	.	.	.	.	.	.	.	.	.	.	.	.	.	.	.	.	.	.	.	.	.	.	.
CC0002	37	.	Female	CRPS-	2.51613	1.5	Hyper-Sensitive	.	.	.	.	.	.	.	.	.	.	.	.	.	.	.	.	.	.	.	.	.	.	.	.	.	.	.	.	.	.	.	.
CC0002	24	.	Male	CRPS-	1.58065	2.45833	Control	.	.	.	.	.	.	.	.	.	.	.	.	.	.	.	.	.	.	.	.	.	.	.	.	.	.	.	.	.	.	.	.
CC0002	25	.	Male	CRPS-	2.16129	2.2	Control	.	.	.	.	.	.	.	.	.	.	.	.	.	.	.	.	.	.	.	.	.	.	.	.	.	.	.	.	.	.	.	.
CC0002	37	.	Male	CRPS-	2.4375	2.52	Hyper-Sensitive	.	.	.	.	.	.	.	.	.	.	.	.	.	.	.	.	.	.	.	.	.	.	.	.	.	.	.	.	.	.	.	.
CC0002	28	.	Male	CRPS-	1.8125	2.30769	Control	.	.	.	.	.	.	.	.	.	.	.	.	.	.	.	.	.	.	.	.	.	.	.	.	.	.	.	.	.	.	.	.
CC0002	34	.	Female	CRPS-	2.09375	2.5	Control	.	.	.	.	.	.	.	.	.	.	.	.	.	.	.	.	.	.	.	.	.	.	.	.	.	.	.	.	.	.	.	.
CC0002	30	.	Female	CRPS-	2.41935	2.03846	Hyper-Sensitive	.	.	.	.	.	.	.	.	.	.	.	.	.	.	.	.	.	.	.	.	.	.	.	.	.	.	.	.	.	.	.	.
CC0002	24	.	Female	CRPS-	1.67742	2.38462	Control	.	.	.	.	.	.	.	.	.	.	.	.	.	.	.	.	.	.	.	.	.	.	.	.	.	.	.	.	.	.	.	.
CC0002	30	.	Female	CRPS-	2.25	1.96154	Control	.	.	.	.	.	.	.	.	.	.	.	.	.	.	.	.	.	.	.	.	.	.	.	.	.	.	.	.	.	.	.	.
